# Supplementary material
Source: PubMed Central journal article supplement (PMC5728442)
Supplement: NIHMS919151-supplement-2.pdf [file NIHMS919151-supplement-2.pdf]

## I. SUPPLEMENTAL FIGURES and LEGENDS

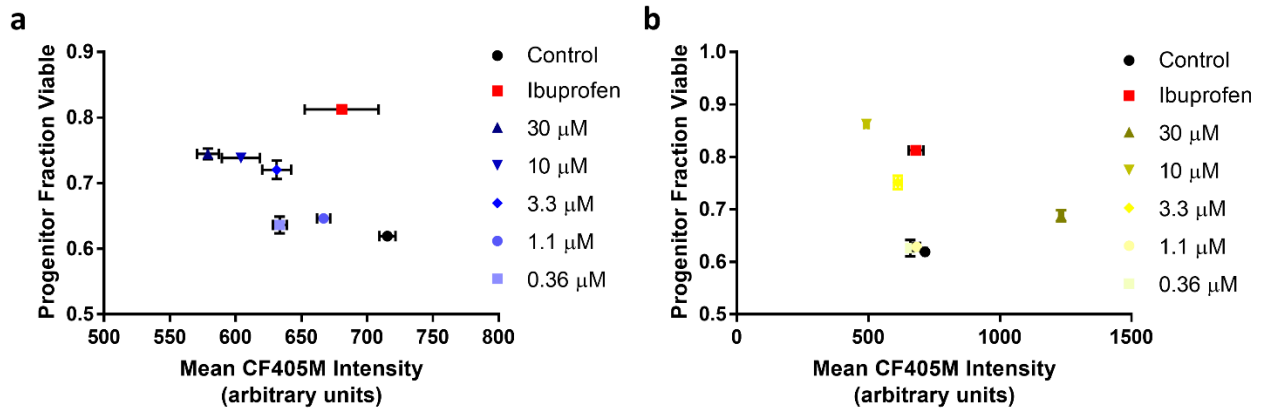

**Supplementary Figure 1. Dose-response of terreic acid and 8-hydroxy-5-nitroquinoline. Related to Figure 4.** Dose-response for cells treated with terreic acid (a) or 8-hydroxy-5-nitroquinoline (b) during 24 hours of culture. Error bars are S.E.M. for four or more replicate wells.
